# Supplementary material
Source: MDPI journal article supplement (https://www.mdpi.com/1424-2818/12/2/61)
Supplement: s1 [file s1]

Archive with 2 entries (2 files):
- Westwood et al. - 2017 - Guidelines for Managing Canada Warbler Habitat.pdf
- Westwood, Reitsma, Lambert - 2017 - Prioritizing Areas for Canada Warbler Conservation and Management.pdf
